# Supplementary material for: Gene expression-based comparison of the human secretory neuroepithelia of the brain choroid plexus and the ocular ciliary body: potential implications for glaucoma
Source: PubMed Central journal article supplement (PMC3909915; doi:10.1186/2045-8118-11-2), 2014-01-29
Supplement: 2045-8118-11-2-S3.pdf [file 2045-8118-11-2-S3.pdf]

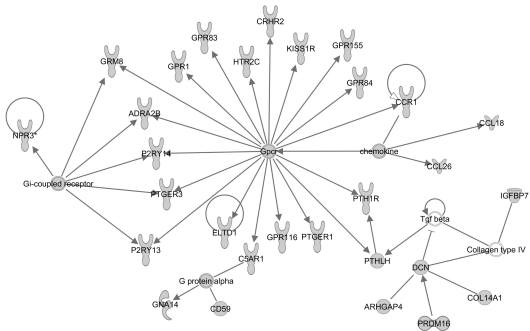

Top functions: Cell to cell signaling and interaction, molecular transport

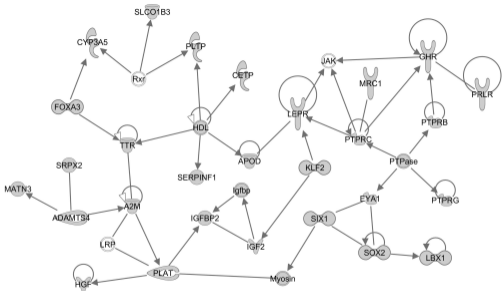

Top functions: Lipid metabolism, molecule transport, small molecule biochemistry

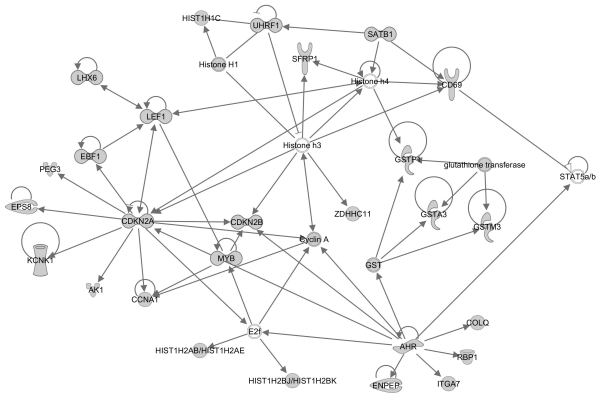

Top functions: Cellular development, hematological system development and function, hematopoiesis

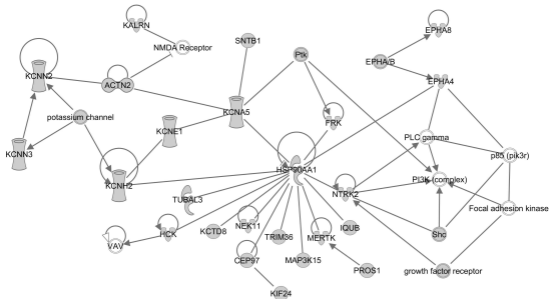

Top functions: Molecular transport, cell to cell signaling and interaction and nervous system development and function

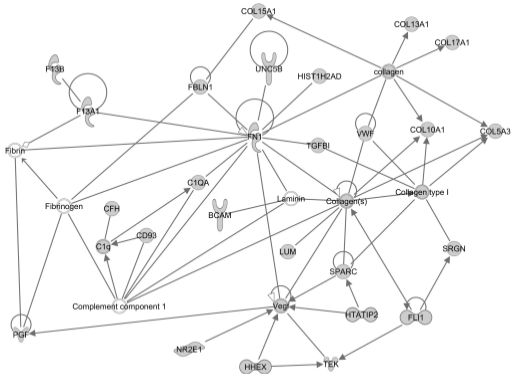

Top functions: Cell to cell signaling and interaction, cellular assembly and organization, tissue development

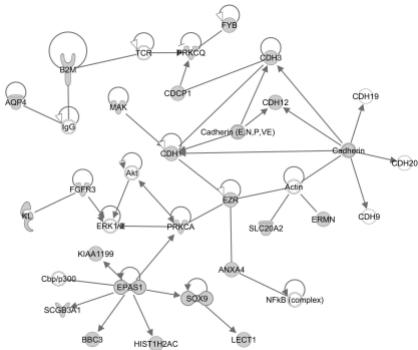

Top functions: Organismal injury and abnormalities, cellular function and maintenance and molecular transport

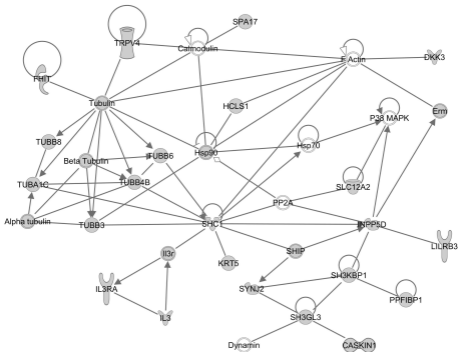

Top functions: Cancer, dermatological disease and conditions, hematological disease

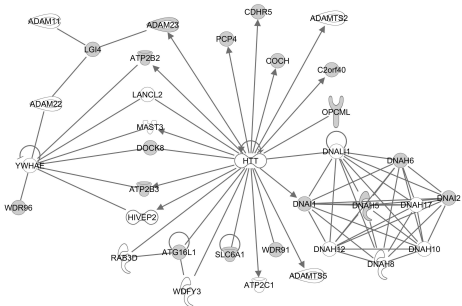

Top functions: Hereditary disorder, respiratory disease, cell signaling



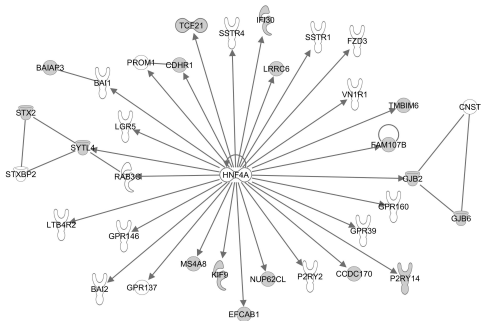

Top functions: Hereditary, auditory and neurological diseases



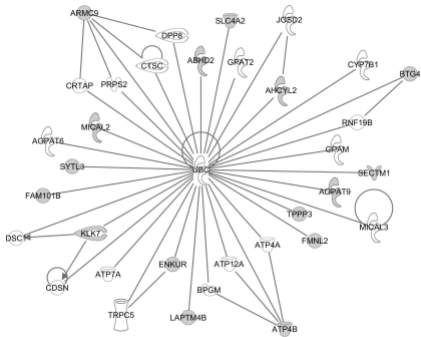

Top functions: Gastrointestinal disease, digestive system development and function, organ morphology

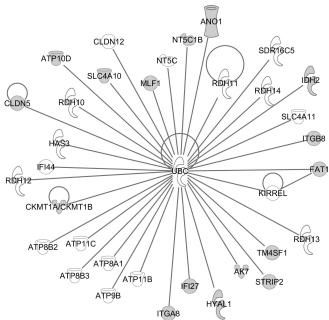

Top functions: Visual system development and function, lipid metabolism, small molecule biochemistry

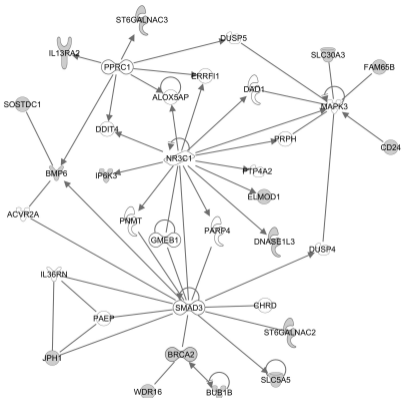

Top functions: Connective tissue disorders, developmental disorder, skeletal and muscular disorders

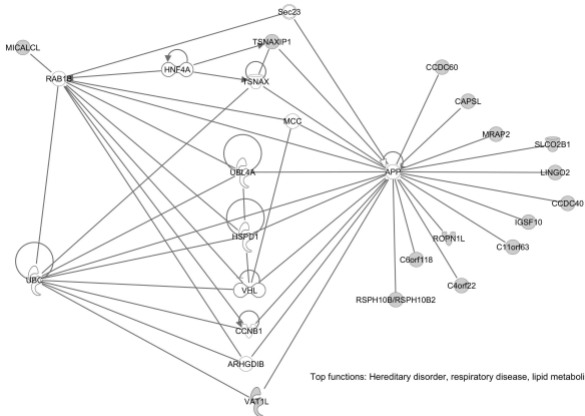

Top functions: Hereditary disorder, respiratory disease, lipid metabolism

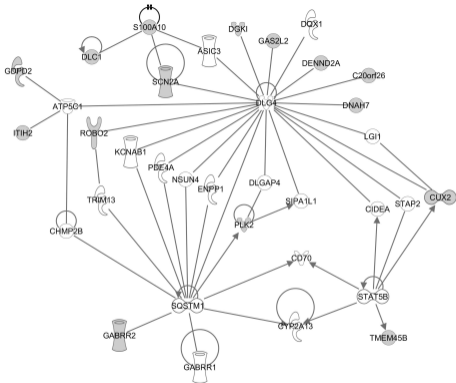

Top functions: Nervous system development and function, nutritional disease, neurological disease

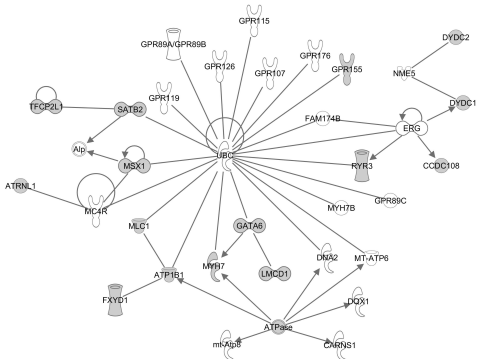

Top functions: DNA replication, recombination, and repair; energy production; nucleic acid metabolism



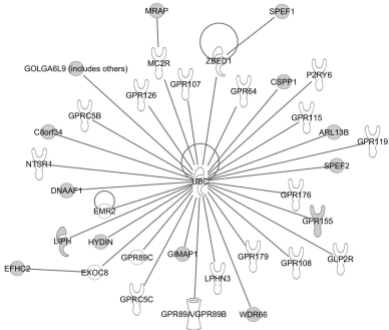

Top functions: Endocrine system disorders, hereditary disorder, respiratory disease

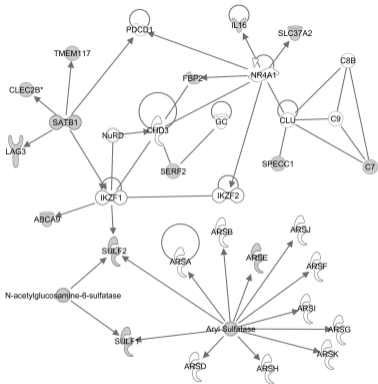

Top functions: Humoral immune response, inflammatory response, carbohydrate metabolism

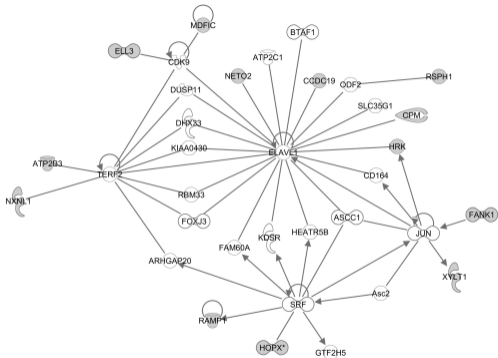

Top functions: Embryonic development, tissue morphology, developmental disorder



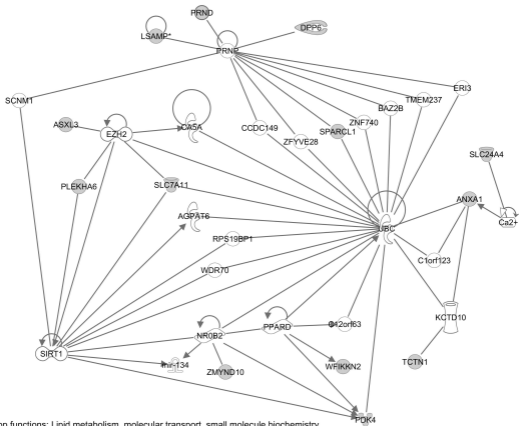

Top functions: Lipid metabolism, molecular transport, small molecule biochemistry

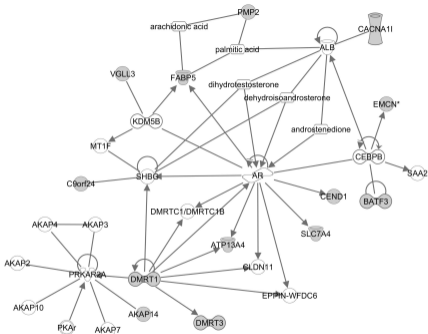

Top functions: Embryonic, organ and organismal development

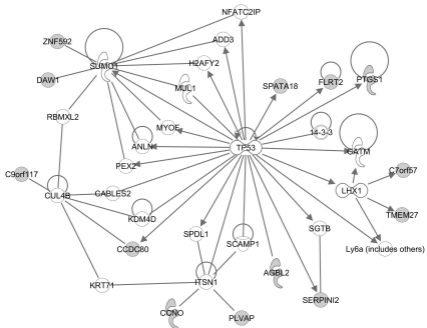

Top functions: Cell cycle, decreased levels of albumin, cell death and survival

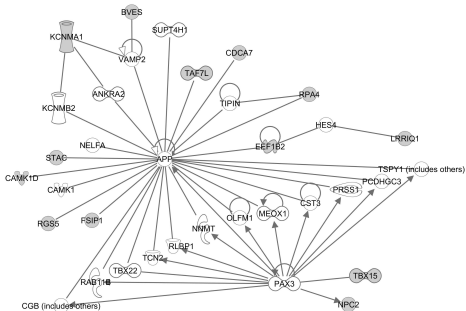

Top functions: Neurological disease, cardiovascular disease, developmental disorder
