# Supplementary material for: Gene expression-based comparison of the human secretory neuroepithelia of the brain choroid plexus and the ocular ciliary body: potential implications for glaucoma
Source: PubMed Central journal article supplement (PMC3909915; doi:10.1186/2045-8118-11-2), 2014-01-29
Supplement: 2045-8118-11-2-S6.pdf [file 2045-8118-11-2-S6.pdf]

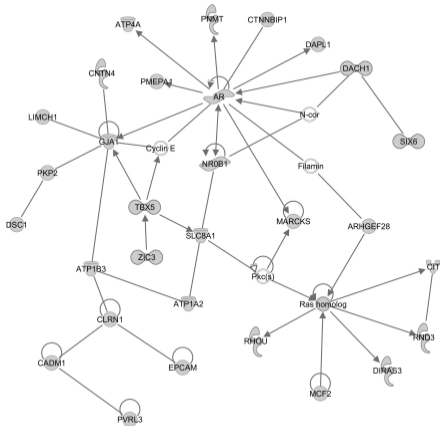

Top functions: Cellular function and maintenance, cellular movement and reproductive system development and function

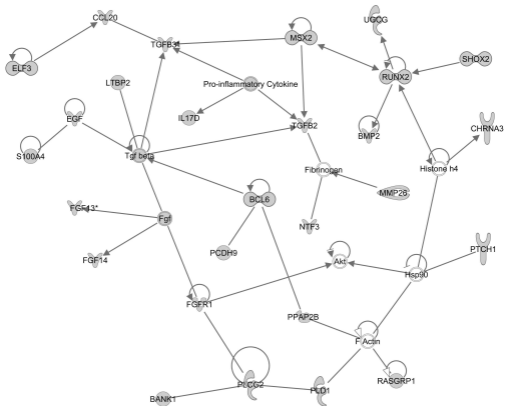

Top functions: Skeletal and muscular system development and function, tissue and cellular development

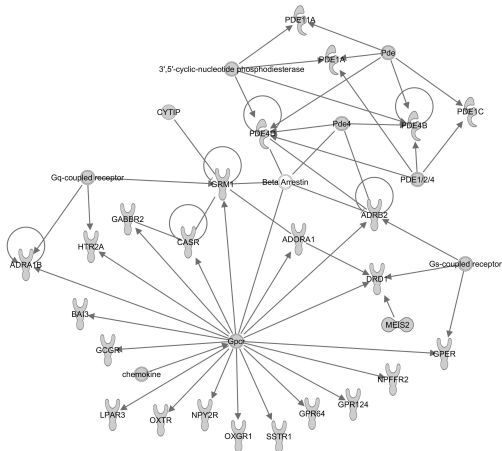

Top functions: Cell to cell signaling and interaction, psychological disorders, cell signaling

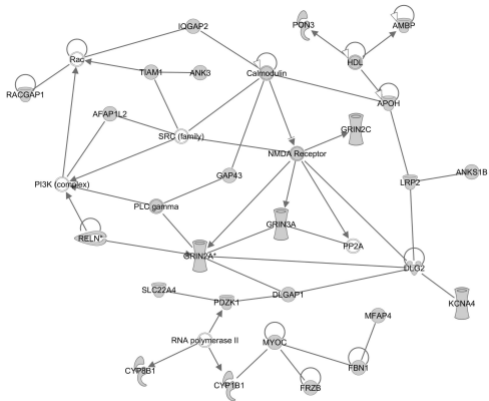

Top functions: Ophthalmic, respiratory and neurological disease

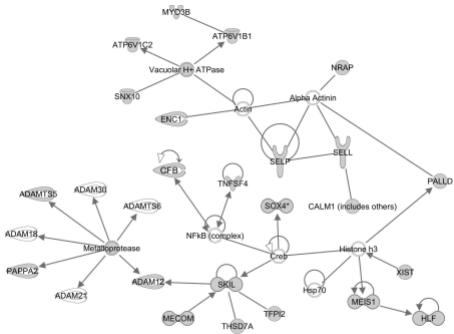

Top functions: Cellular movement, hematological system development and function, immune cell trafficking

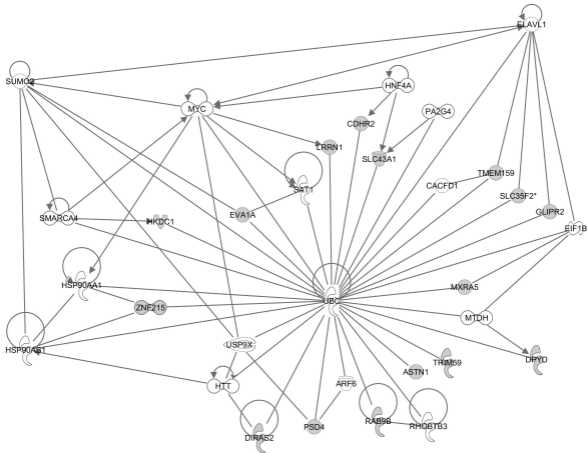

Top functions: Molecule transport, small molecule biochemistry and cell death and survival

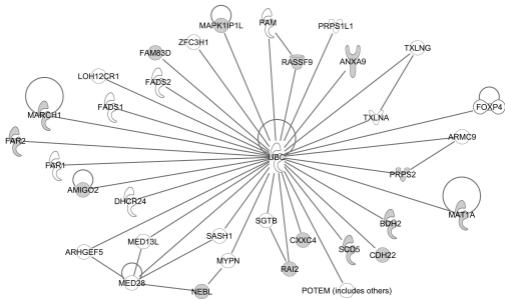

Top functions: Lipid metabolism, small molecule biochemistry and dermatological disease and conditions

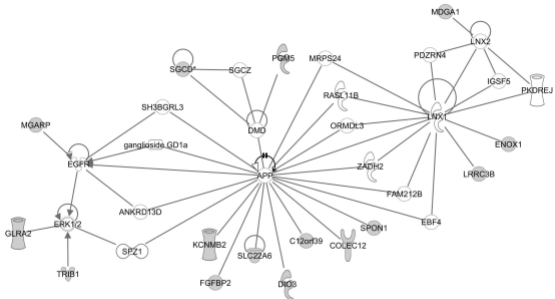

Top functions: Developmental disorder, cell to cell signaling and interaction, nervous system development and function



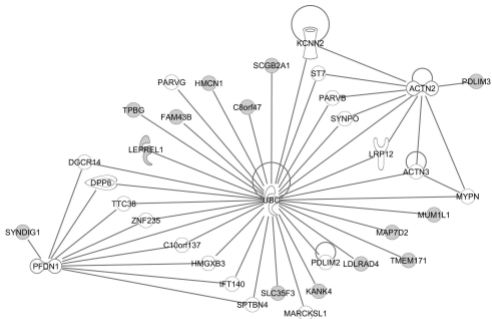

Top functions: Hereditary disorder, ophthalmic disease, cardiovascular disease

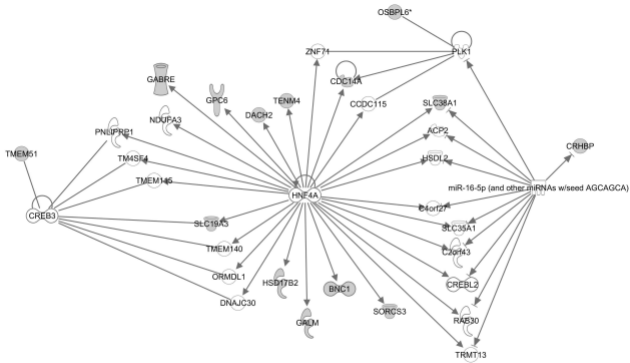

Top functions: Cellular assembly and organization, DNA replication, recombination, and repair and neurological disease

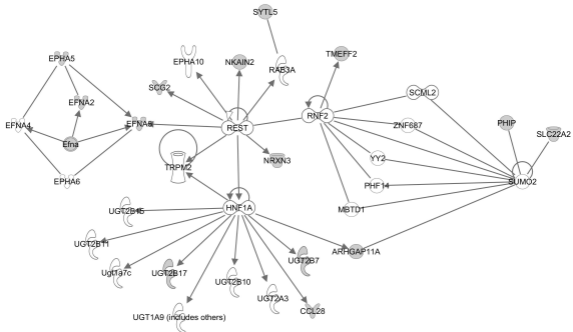

Top functions: Lipid metabolism, small molecule biochemistry, endocrine system development and function

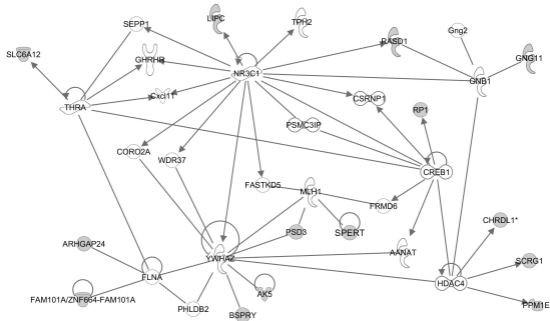

Top functions: Amino acid metabolism, small molecule biochemistry and behavior

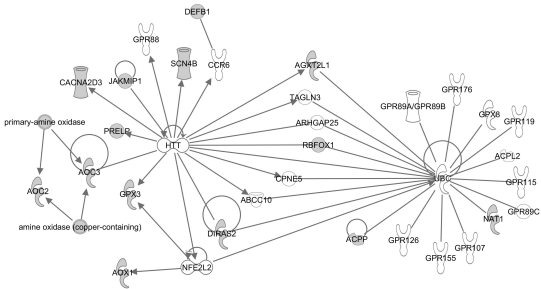

Top functions: Hereditary disorder, neurological disease and psychological disorders

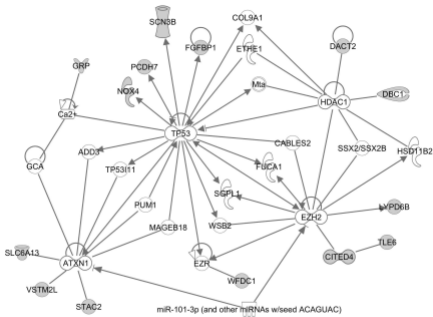

Top functions: Developmental disorder, endocrine system disorders and reproductive system disease

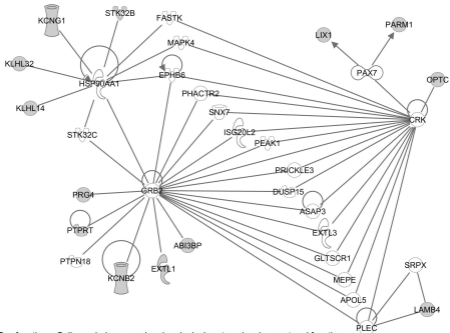

Top functions: Cell morphology, renal and urological system development and function

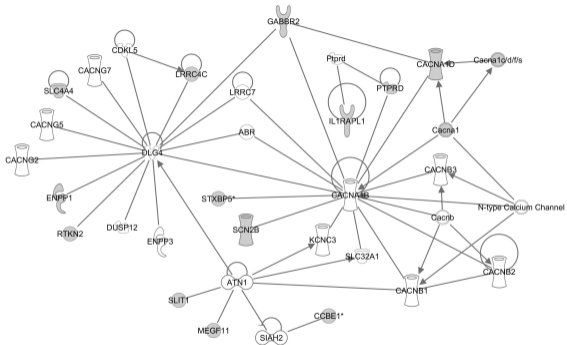

Top functions: Cardiovascular disease, organismal injury and abnormalities and cardiac arteriopathy



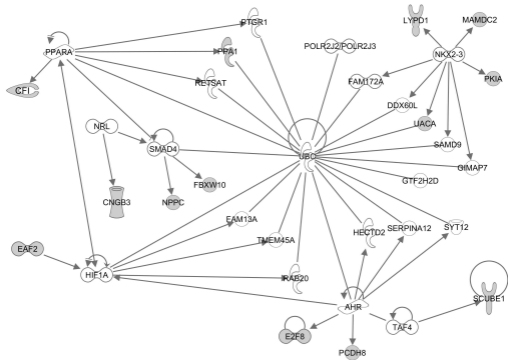

Top functions: Cancer, gastrointestinal and hepatic system disease

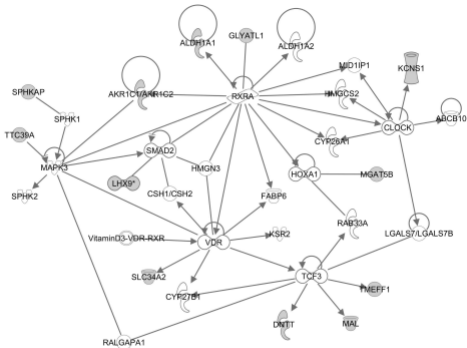

Top functions: Vitamin, mineral, drug and lipid metabolism

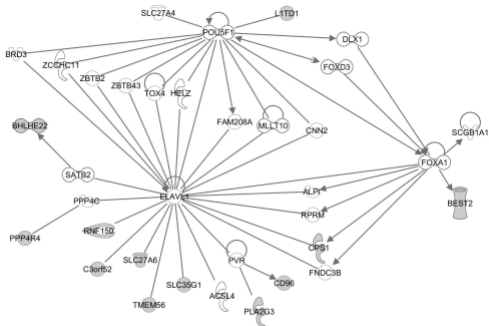

Top functions: Dermatological diseases, lipid and small molecule metabolism

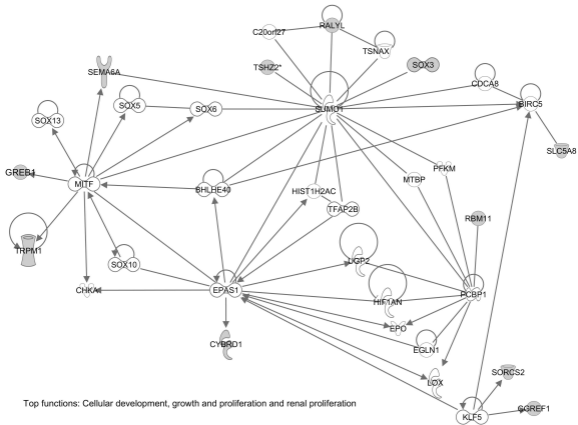

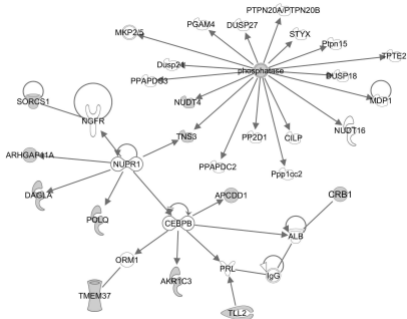

Top functions: Cell to cell signaling and interaction, lipid metabolism, reproductive system development and function

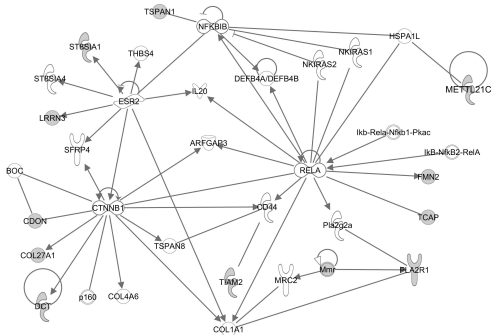

Top functions: Connective tissue, skeletal, muscular and dermatological disorders

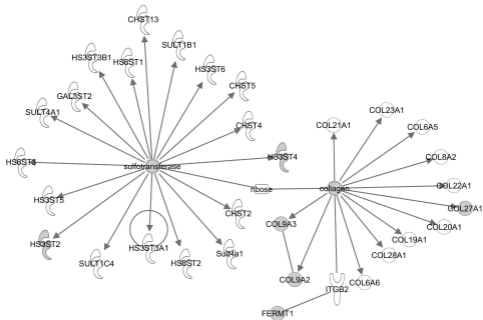

Top functions: Connective tissue disorders, dermatological and gastrointestinal diseases

## Network 25 - NPE

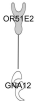

Top functions: Cancer and cellular movement
